# Supplementary material
Source: MDPI journal article supplement (https://www.mdpi.com/2673-1924/3/4/34)
Supplement: s1 [file s1]

# When and Where Did They Strand? The Spatio-Temporal Hotspot Patterns of Cetacean Stranding Events in Indonesia

Putu Liza Kusuma Mustika <sup>1,2,3,4,\*</sup>, Kathryn K. High <sup>5,6</sup>, Mochamad Iqbal Herwata Putra <sup>7</sup>, Achmad Sahri <sup>8</sup>, I Made Jaya Ratha <sup>1,3,4</sup>, Muhammad Offal Prinanda <sup>1,3</sup>, Firdaus Agung <sup>9</sup>, Februanty S. Purnomo <sup>10</sup> and Danielle Kreb <sup>11</sup>

- <sup>1</sup> Reef Check Indonesia, Jl. Tukad Balian Gg. 43 No. 1A, Renon, Kec. Denpasar Selatan, Kota Denpasar, Bali 80234, Indonesia
  - <sup>2</sup> College of Business, Law and Governance, James Cook University, Townsville, Queensland 4811, Australia
  - <sup>3</sup> Whale Stranding Indonesia, Jl. Kalibaru Timur, Cilincing, Jakarta 14110, Indonesia
  - <sup>4</sup> Cetacean Sirenian Indonesia, Jl. Kalibaru Timur, Cilincing, Jakarta 14110, Indonesia
  - <sup>5</sup> Ornithology and Mammalogy Department, California Academy of Sciences, 55 Music Concourse Drive, Golden Gate Park, San Francisco, CA 94118, USA
  - <sup>6</sup> Estuary & Ocean Science Center, San Francisco State University, Tiburon, CA 94920, USA
  - <sup>7</sup> Elasmobranch and Charismatic Species Program, Konservasi Indonesia, Jakarta 12510, Indonesia
  - <sup>8</sup> Research Center for Oceanography, National Research and Innovation Agency, Jl. Pasir Putih 1, Ancol Timur, Jakarta 14430, Indonesia
  - <sup>9</sup> The Directorate for Marine Conservation and Biodiversity, Ministry of Marine Affairs and Fisheries, Gedung Mina Bahari III Lt. 11, Jl. Medan Merdeka Timur No. 16, Jakarta 10110, Indonesia
  - <sup>10</sup> Indonesia Climate Change Trust Fund, Lippo Kuningan 15th Floor Jl. H.R. Rasuna Said Kav.B-12, Jakarta 12940, Indonesia
  - <sup>11</sup> Yayasan Konservasi RASI, Komplek Pandan Harum Indah Blok C52, Samarinda 75124, East Kalimantan
- \* Correspondence: putuliza@gmail.com

**Table S1.** The recap of species-specific stranding events in Indonesia (1995–2021).

| No | Latin name                        | English name                    | Cases | Percent (out of n=568) |
|----|-----------------------------------|---------------------------------|-------|------------------------|
| 1  | <i>Balaenoptera acutorostrata</i> | Minke whale                     | 2     | 0.35                   |
| 2  | <i>Balaenoptera edeni</i>         | Bryde's whale                   | 16    | 2.82                   |
| 3  | <i>Balaenoptera musculus</i>      | Blue whale                      | 6     | 1.06                   |
|    | <i>Balaenopteridae</i>            | unidentified baleen whale       | 25    | 4.40                   |
|    | <i>Delphinidae</i>                | unidentified dolphins           | 12    | 2.11                   |
| 4  | <i>Delphinus capensis</i>         | Long-beaked common dolphin      | 1     | 0.18                   |
| 5  | <i>Feresa attenuata</i>           | Pygmy killer whale              | 12    | 2.11                   |
| 6  | <i>Globicephala macrorhynchus</i> | Short-finned pilot whale        | 31    | 5.46                   |
| 7  | <i>Grampus griseus</i>            | Risso's dolphin                 | 13    | 2.29                   |
| 8  | <i>Kogia breviceps</i>            | Pygmy sperm whale               | 5     | 0.88                   |
| 9  | <i>Kogia sima</i>                 | Dwarf sperm whale               | 11    | 1.94                   |
|    | <i>Kogia sp.</i>                  |                                 | 2     | 0.35                   |
| 10 | <i>Lagenodelphis hosei</i>        | Fraser's dolphin                | 7     | 1.23                   |
| 11 | <i>Megaptera novaeangliae</i>     | Humpback whale                  | 10    | 1.76                   |
| 12 | <i>Mesoplodon densirostris</i>    | Blainville's beaked whale       | 2     | 0.35                   |
| 13 | <i>Neophocaena phocaenoides</i>   | Finless porpoise                | 24    | 4.23                   |
| 14 | <i>Orcaella brevirostris</i>      | Irrawaddy dolphin               | 102   | 17.96                  |
| 15 | <i>Orcinus orca</i>               | Killer Whale                    | 3     | 0.53                   |
| 16 | <i>Peponocephala electra</i>      | Melon Headed Whale              | 14    | 2.46                   |
| 17 | <i>Physeter macrocephalus</i>     | Sperm whale                     | 75    | 13.20                  |
| 18 | <i>Pseudorca crassidens</i>       | False killer whale              | 6     | 1.06                   |
| 19 | <i>Sousa chinensis</i>            | Indo-Pacific humpback dolphin   | 6     | 1.06                   |
| 20 | <i>Stenella attenuata</i>         | Pantropical spotted dolphin     | 9     | 1.58                   |
| 21 | <i>Stenella coeruleoalba</i>      | Striped dolphin                 | 3     | 0.53                   |
| 22 | <i>Stenella longirostris</i>      | Spinner dolphin                 | 29    | 5.11                   |
|    | <i>Stenella sp.</i>               |                                 | 1     | 0.18                   |
| 23 | <i>Steno bredanensis</i>          | Rough-toothed dolphin           | 8     | 1.41                   |
| 24 | <i>Tursiops aduncus</i>           | Indo-Pacific bottlenose dolphin | 12    | 2.11                   |
|    | <i>Tursiops sp.</i>               | Bottlenose dolphin              | 11    | 1.94                   |

|              |                            |                           |            |       |
|--------------|----------------------------|---------------------------|------------|-------|
| 25           | <i>Tursiops truncatus</i>  | Common bottlenose dolphin | 4          | 0.70  |
|              | unidentified species       | unidentified species      | 95         | 16.73 |
| 26           | <i>Ziphius cavirostris</i> | Cuvier's beaked whale     | 11         | 1.94  |
| <b>TOTAL</b> |                            |                           | <b>568</b> |       |

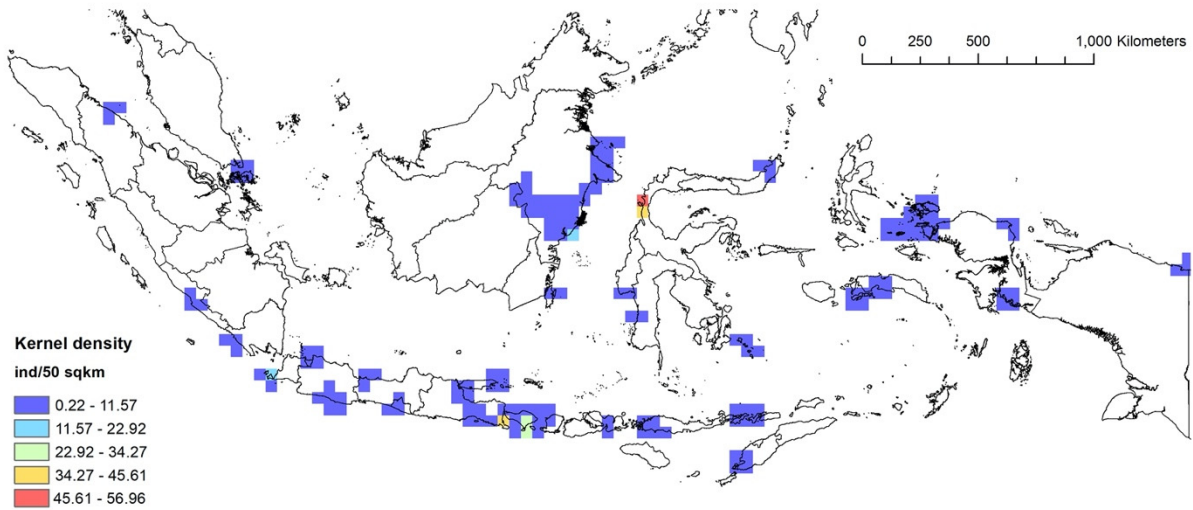

**Figure S1.** The kernel density analysis of the 1995–2011 stranding events based on the number of stranded individuals.

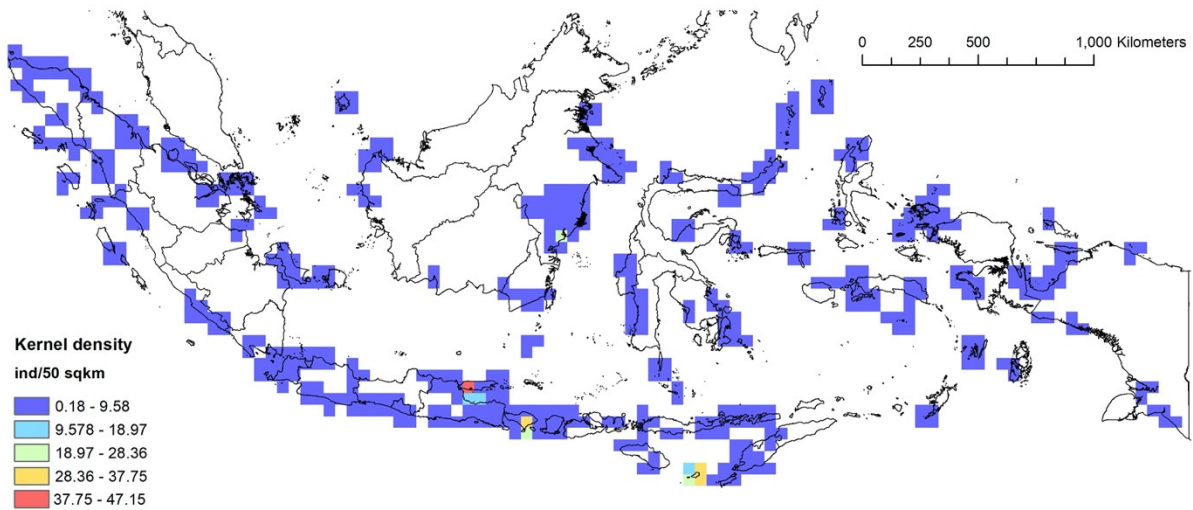

**Figure S2.** The kernel density analysis of the 2012–2021 stranding events based on the number of stranded individuals.

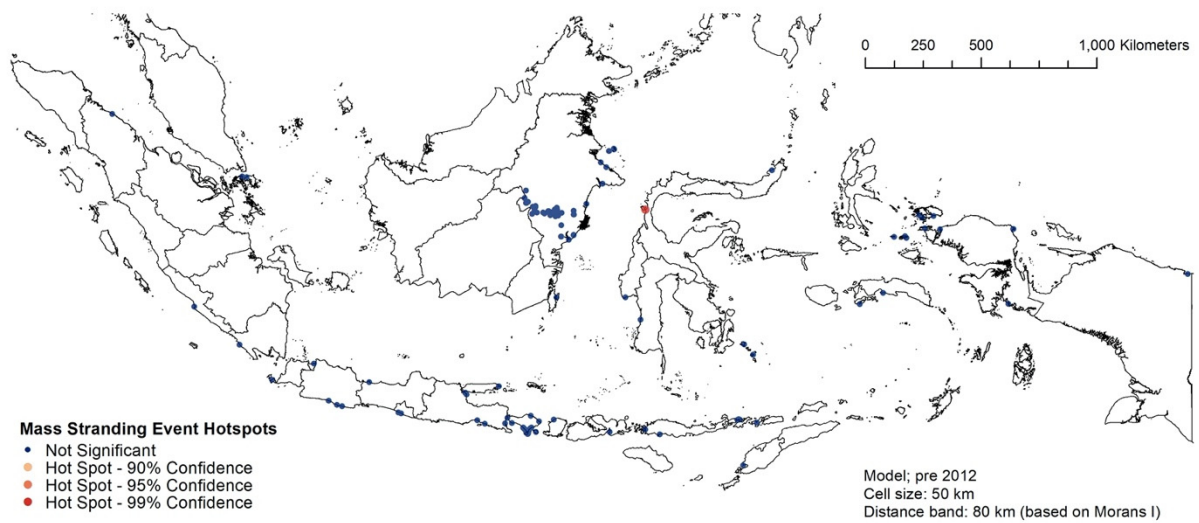

**Figure S3.** The spatial hotspot analysis of mass stranding events of 1995–2011.

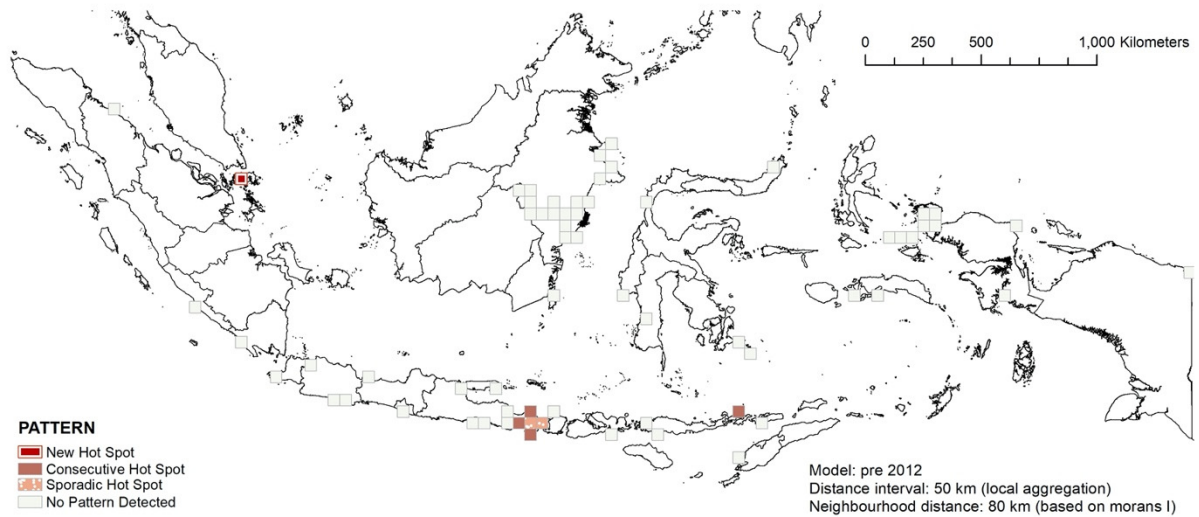

**Figure S4.** The space-time hotspot patterns of the 1995–2011 stranding events.

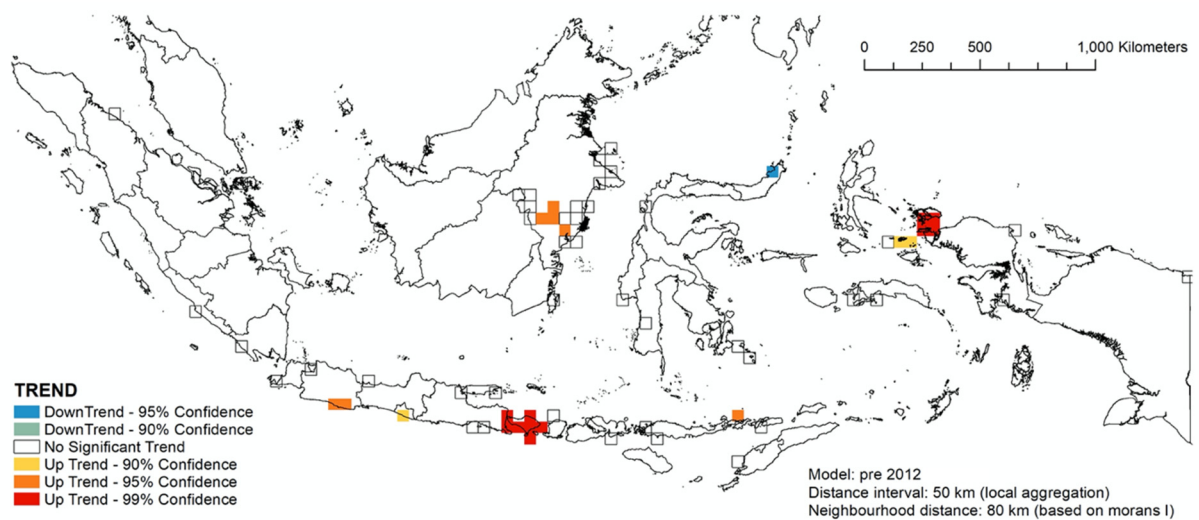

**Figure S5.** The temporal hotspot patterns of the 1995–2011 stranding events.
